## Epigenetic bookmarking of H<sub>2</sub>S exposure in *Caenorhabditis elegans*

Emily M. Fawcett<sup>1,2</sup>, Jenna K. Johnson<sup>3</sup>, Chris Braden<sup>1</sup>, Esteli M. Garcia<sup>1</sup>, and Dana L. Miller<sup>1,2\*</sup>

<sup>1</sup>University of Washington School of Medicine, Department of Biochemistry and <sup>2</sup>Graduate Program in Molecular and Cellular Biology, Seattle, WA, and <sup>3</sup>Department of Biology, Luther College, Decorah, IA

\*Corresponding author: DLM

phone: 206-685-5025

email: dlm16@uw.edu

short title: hydrogen sulfide-induced epigenetic bookmarking

## Abstract

2        Physiological memories of environmental stress can serve to predict future  
environmental changes, allowing the organism to initiate protective mechanisms and  
4        survive. Although physiological memories, or bookmarks, of environmental stress have  
been described in a wide range of organisms, from bacteria to plants to humans, the  
6        mechanism by which these memories persist in the absence of stress is still largely  
unknown. We have discovered that *C. elegans* transiently exposed to low doses of hydrogen  
8        sulfide (H<sub>2</sub>S) survive subsequent exposure to otherwise lethal H<sub>2</sub>S concentrations and  
induce H<sub>2</sub>S-responsive transcripts more robustly than naïve controls. H<sub>2</sub>S bookmarking can  
10        occur at any developmental stage and persists through cell divisions and development but  
is erased by fasting. We show that maintenance of the H<sub>2</sub>S bookmark requires the SET-2  
12        histone methyltransferase and the CoREST-like demethylase complex. We propose a model  
in which exposure to low doses of H<sub>2</sub>S generates a long-lasting, epigenetic memory by  
14        modulating H3K4me2 modifications at specific promoters. Understanding the fundamental  
aspects of H<sub>2</sub>S bookmarking in this tractable system can provide mechanistic insight into  
16        how environmental exposures are translated into the epigenetic landscape in animals.

# Introduction

One strategy animals use to maximize survival in a changing environment is to anticipate changes based on prior experiences. In some situations, physiological adaptations to environmental changes persist long after the initial stimulus has been removed. These sustained cellular memories of previous life experiences are known as environmental bookmarks (reviewed in (Kinoshita and Seki, 2014). Perhaps the best-studied example is in the budding yeast *Saccharomyces cerevisiae*, where cells which have previously been grown in media containing galactose respond to subsequent galactose exposure faster than naïve yeast (Kundu et al., 2007). Similarly, human retinal cells in culture retain markers of high glucose stress long after glucose levels have normalized (Ihnat et al., 2007).

H<sub>2</sub>S is common in the environment: in addition to natural sources of H<sub>2</sub>S, such as volcanic gasses and anaerobic bacteria in saline marshes, H<sub>2</sub>S is produced and emitted from large livestock farms, power plants, oil and natural gas refineries and pipelines, and during the production of glue, plastics, and asphalt (Beauchamp et al., 1984). The effects of long-term exposure to low H<sub>2</sub>S are poorly understood, but may contribute to neurological, respiratory, and cardiovascular dysfunction in humans (Kilburn and Warshaw, 1995; Richardson, 1995; Bates et al., 2002). However, exogenous H<sub>2</sub>S can also have beneficial effects in mammals, improving outcome in mammalian models of ischemia/reperfusion injury (Bos et al., 2015; Wu et al., 2015; Sen, 2017) and mediating at least some of the beneficial effects of dietary restriction (Hine et al., 2015).

*C. elegans* is an excellent model to understand the molecular and genetic pathways that mediate the responses to H<sub>2</sub>S and thereby the beneficial and/or detrimental physiological effects of H<sub>2</sub>S in animals. Just as exposure to high concentrations of H<sub>2</sub>S is lethal in mammals, *C. elegans* die when exposed to high concentrations of H<sub>2</sub>S (Budde and Roth, 2010). However, *C. elegans* grown in low H<sub>2</sub>S are long-lived and thermotolerant (Miller and Roth, 2007) and are better able to maintain proteostasis in hypoxia (Fawcett et al., 2015), suggesting that at least some protective effects of H<sub>2</sub>S observed in mammals may be recapitulated in the *C. elegans* model.

We have discovered a novel environmental bookmark in *C. elegans* formed by exposure to hydrogen sulfide (H<sub>2</sub>S). We show that transient exposure to low H<sub>2</sub>S leads to formation of a bookmark, which enables animals to survive subsequent exposure to otherwise lethal concentrations of H<sub>2</sub>S. This bookmark is quite stable, in that it can persist throughout development and far into adulthood. However, we have found that it is possible to reverse the bookmark by short periods of fasting. We further demonstrate that animals that have acquired the H<sub>2</sub>S bookmark induce the expression of some H<sub>2</sub>S-induced genes more robustly than naïve controls. These data suggest an epigenetic modification at the promoters of these bookmarked genes. Indeed, we demonstrate that mutations in the conserved histone H3 lysine 4 (H3K4) methyltransferase SET-2 and the H3K4me<sub>2</sub> demethylase CoREST-like complex abrogate the ability to maintain the persistent effects of H<sub>2</sub>S exposure. Our results suggest that exposure to H<sub>2</sub>S results in changes in the methylation status of H3K4 at a subset of H<sub>2</sub>S-responsive promoters, which facilitates a robust transcriptional response that allows animals to survive subsequent H<sub>2</sub>S exposure.

# Results

*Exposure to low H<sub>2</sub>S forms an environmental bookmark.*

*C. elegans* grown in low H<sub>2</sub>S (50 ppm H<sub>2</sub>S in otherwise normal room air) have increased lifespan, increased thermotolerance, and improved maintenance of proteostasis (Miller and Roth, 2007; Fawcett et al., 2015). These animals raised in low H<sub>2</sub>S are also acclimatized, as they can survive when transferred to high H<sub>2</sub>S (concentrations higher than 150 ppm), a dose that is lethal to naïve controls (Budde and Roth, 2010). We repeated these experiments, confirming that animals grown in low H<sub>2</sub>S survived when transferred to high sulfide (Fig 1A). Although continuous exposure throughout development is required for H<sub>2</sub>S-induced thermotolerance and lifespan extension, shorter exposure to H<sub>2</sub>S is sufficient to protect against hypoxia-induced disruption of proteostasis (Miller and Roth, 2007; Fawcett et al., 2015). We therefore asked if shorter exposure to low H<sub>2</sub>S was sufficient to induce acclimatization. We exposed fourth-stage larvae (L4) *C. elegans* to low H<sub>2</sub>S for only 6 h and then immediately challenged animals with exposure to high H<sub>2</sub>S (150 ppm H<sub>2</sub>S in room air) overnight. Although all naïve animals exposed to high H<sub>2</sub>S died, 100% of animals that had a short acclimation to low H<sub>2</sub>S survived the subsequent exposure to high H<sub>2</sub>S (Fig 1A). This suggests that the physiological changes that occur in low H<sub>2</sub>S are relatively rapid and acclimatization does not require continuous growth in low H<sub>2</sub>S.

We next asked if animals that were acclimated to low H<sub>2</sub>S could form a persistent, physiological memory of the exposure to H<sub>2</sub>S. We exposed first-stage larvae (L1) to low H<sub>2</sub>S for 6h, then returned the animals to room air. When the animals reached L4 we challenged them with exposure to high H<sub>2</sub>S overnight. We found that all of the animals survived this

treatment (Fig 1A). Thus, the effects of exposure to low H<sub>2</sub>S do not require direct transfer  
 84 into high H<sub>2</sub>S, but instead can be maintained even in the absence of continued exposure to  
 H<sub>2</sub>S. This suggests that there is a process that occurs in addition to acclimatization, which  
 86 can be achieved simply by activation of HIF-1 transcriptional activity. We refer to this long-  
 lasting physiological memory of H<sub>2</sub>S exposure as H<sub>2</sub>S bookmarking to distinguish it from  
 88 acclimation.

The exposure to low H<sub>2</sub>S required to generate the H<sub>2</sub>S bookmark is time- and dose-  
 90 dependent. We initially chose 50 ppm H<sub>2</sub>S for the low H<sub>2</sub>S exposure based on prior work  
 demonstrating that this concentration of H<sub>2</sub>S causes clear physiological effects, such as  
 92 increased lifespan and resistance to the hypoxia-induced disturbance of proteostasis  
 (Miller and Roth, 2007, #51252; Fawcett et al., 2015). However, we found that animals  
 94 exposed to only 20 ppm H<sub>2</sub>S developed the H<sub>2</sub>S bookmark and survived subsequent  
 exposure to high H<sub>2</sub>S, though a longer exposure to the low H<sub>2</sub>S environment was required  
 96 than at 50 ppm H<sub>2</sub>S (Fig 1B). Conversely, the bookmark was formed more rapidly at higher  
 concentration of H<sub>2</sub>S, as even a 1h exposure to 150 ppm H<sub>2</sub>S was sufficient for survival of  
 98 subsequent exposure. These data indicate that the bookmarking process can be quite rapid,  
 but that the formation of the bookmark requires a threshold H<sub>2</sub>S exposure.

100 Stabilization of the HIF-1 transcription factor has been proposed to underlie the  
 acclimatization to H<sub>2</sub>S (Budde and Roth, 2010). HIF-1 accumulates in animals exposed to  
 102 H<sub>2</sub>S, and constitutive activation of HIF-1, from mutation of either *egl-9* or *vhl-1*, is sufficient  
 for *C. elegans* to survive exposure to high H<sub>2</sub>S (Budde and Roth, 2010). We could not test  
 104 directly whether *hif-1* is required for acclimatization or bookmarking, because *hif-1* mutant

animals die when exposed to low H<sub>2</sub>S (Budde and Roth, 2010). However, we reasoned that if activation of HIF-1 was sufficient for acclimatization then animals exposed to low O<sub>2</sub> (hypoxia) would also survive if transferred to high H<sub>2</sub>S. Consistent with this hypothesis, we observed increased survival of animals exposed to high sulfide when transferred directly from 5000 ppm O<sub>2</sub>, a condition where HIF-1 is activated (Fig 1C; Jiang et al., 2001, #24680). This result supports the hypothesis that activation of HIF-1 is sufficient for acclimation. However, the penetrance of survival was never as high as when animals were transferred from low H<sub>2</sub>S. This difference in penetrance could reflect the fact that although HIF-1 induces gene expression in both hypoxia and H<sub>2</sub>S, different transcripts accumulate in each condition (Miller et al., 2011). Alternatively, it could be that other factors that contribute to the process of H<sub>2</sub>S bookmarking are not engaged by exposure to hypoxia. We favor this model, because the acclimation induced by exposure to hypoxia is rapidly lost upon return to room air (Fig 1C). Thus, although the animals had acclimated they had not formed a persistent physiological memory consistent with H<sub>2</sub>S bookmarking.

We considered the possibility that the exposure to hypoxia activated stress response pathways that were cross-protective in H<sub>2</sub>S. Many well-studied stress response pathways are activated by and protective against multiple environmental stresses. For example, activation of the insulin-like signaling pathway leads to increased resistance to thermal, oxidative, and nutritional stress (McColl et al., 2010). Although exposure to H<sub>2</sub>S does not activate common stress-response pathways in *C. elegans*, including insulin-like signaling, TOR, and p53 signaling (Miller and Roth, 2009; Miller et al., 2011), we considered the possibility that protection by H<sub>2</sub>S bookmarking may be a result of the activation of such

cross protective stress response pathways. We first tested whether inducing the heat shock response would protect against subsequent H<sub>2</sub>S exposure, as the heat-shock response is cross protective against several other stresses, including salt stress and oxidative stress, and animals grown in H<sub>2</sub>S are resistant to thermal stress (Völker et al., 1992; Miller and Roth, 2007; Verghese et al., 2012). We found that subjecting animals to a non-lethal heat shock did not protect against subsequent exposure to high H<sub>2</sub>S (Supplemental Fig 1A). Furthermore, animals with mutations in candidate cross-protective stress response signaling pathways, including those involved in the response to heat shock, nutrient deprivation, hypoxic stress, and osmotic stress did not have a defect in the formation or maintenance of H<sub>2</sub>S bookmarking (Supplemental Fig 1B). Taken together, these results suggest that H<sub>2</sub>S bookmarking is a specific response to H<sub>2</sub>S.

### *H<sub>2</sub>S bookmarking is persistent, but reversible.*

During development, there are sometimes critical windows during which animals are most sensitive to certain environmental stimuli. For example, in *C. elegans*, the decision to enter dauer is determined by conditions during the first larval stage (Golden and Riddle, 1984). To determine if there was a specific developmental window in which H<sub>2</sub>S bookmarks could be formed, we exposed synchronized cohorts of *C. elegans* at different developmental stages to low H<sub>2</sub>S, and then tested their ability to survive exposure to high H<sub>2</sub>S after 48 h in room air. All animals survived subsequent exposure to high H<sub>2</sub>S, regardless of developmental stage at time of adaptation (Fig 2A). We conclude that H<sub>2</sub>S bookmarking can occur at any point in the lifetime of the animal.



We next asked how long the H<sub>2</sub>S bookmark could persist. To measure this, we  
 150 acclimated embryos to low H<sub>2</sub>S for 8 h, then let them grow in room air for increasing time  
 before exposure to high H<sub>2</sub>S. We found that all animals exposed to H<sub>2</sub>S as embryos survived  
 152 exposure to high H<sub>2</sub>S as much as 72h later, when the cohort were reproductive adults (Fig  
 2B). However, after 72h the survival of bookmarked animals began to decline and by 96h  
 154 after the initial exposure most animals died when exposed to high H<sub>2</sub>S. The exact duration  
 that the bookmark is maintained is somewhat dose-dependent, in that the decline began  
 156 sooner if the acclimation period was shortened. These data indicate that the H<sub>2</sub>S bookmark  
 can be maintained throughout embryonic and postembryonic development, but that it  
 158 eventually spontaneously lost.

The fact that the bookmark spontaneously reversed as the animals aged led us to  
 160 investigate the possibility that the rate of spontaneous reversal changed with age. To test  
 this possibility, we exposed synchronized, aging cohorts of animals to low H<sub>2</sub>S for 6h and  
 162 then let the animals age in room air for another 48h before challenging the animals with  
 exposure to high H<sub>2</sub>S. We found that animals were able to form and maintain the H<sub>2</sub>S  
 164 bookmark through day 3 of adulthood. However, starting at day 5 we observed a  
 progressive decrease in the ability to survive the subsequent exposure to high H<sub>2</sub>S (Fig 2C).  
 166 This result suggests that the H<sub>2</sub>S bookmark is formed or maintained less effectively in older  
 animals. We did not observe a similar decline in acclimatization, as all animals survived  
 168 when we transferred old animals to high H<sub>2</sub>S immediately after exposure to low H<sub>2</sub>S.  
 Together these data suggest that H<sub>2</sub>S bookmarking – but not acclimatization – is less  
 170 efficient with increasing age.

# *H<sub>2</sub>S bookmarking is reversed by fasting*

While characterizing the H<sub>2</sub>S bookmarking phenotype, we noticed that animals on plates in which the food source had been depleted no longer displayed robust survival in high H<sub>2</sub>S. We hypothesized that H<sub>2</sub>S bookmarking may be modulated by food availability. To test this possibility, we adapted embryos to low H<sub>2</sub>S for 12 hours on plates seeded with OP50 *E. coli* bacteria. We then removed half of the animals from food for 6-12 hours as first-stage larvae (L1), then returned these animals to normal food conditions. We challenged both fed and fasted animals with high H<sub>2</sub>S when they reached day 1 of adulthood. The proportion of animals that survived exposure to high H<sub>2</sub>S was significantly lower in the fasted animals (Fig 3A). This result suggests that fasting prevents maintenance of, or actively reverses, the H<sub>2</sub>S bookmark. This led us to next determine if fasting also prevented formation of the H<sub>2</sub>S bookmark. To test this possibility, we exposed starved L1 to low H<sub>2</sub>S for acclimation, then returned the animals to food in the absence of H<sub>2</sub>S. In contrast to animals acclimated to low H<sub>2</sub>S on food, animals exposed to low H<sub>2</sub>S in the absence of food did not survive subsequent exposure to high H<sub>2</sub>S (Fig 3B). These results suggest that both formation and maintenance of the H<sub>2</sub>S bookmark is inhibited by fasting.

When *C. elegans* embryos hatch in the absence of food, starved L1 enter a reversible developmental arrest, the L1 diapause (reviewed in (Baugh, 2013)). To confirm that fasting itself reverses H<sub>2</sub>S bookmarking, and not the physiological changes associated with entry into the L1 diapause, we fasted animals at other developmental stages and scored for H<sub>2</sub>S bookmarking retention. We found that fasting at later developmental stages did erase the H<sub>2</sub>S bookmark (Fig 3C). Bookmarked animals removed from food for only 6 hours as L4s

displayed a significant decrease in survival when later challenged with high H<sub>2</sub>S. This effect was more pronounced when the period of fasting increased. We conclude that fasting, or the response to food deprivation, effectively reverses the H<sub>2</sub>S bookmark.

One possibility is that activation of various stress responses, in addition to fasting, would erase the effect of the H<sub>2</sub>S bookmark. We therefore evaluated whether heat shock or hypoxia would reduce the ability of animals with an H<sub>2</sub>S bookmark to survive subsequent exposure to high H<sub>2</sub>S. We chose these two stresses because they both have global effects on physiology and metabolism, as fasting does. We found that neither hypoxia nor heat shock reversed the H<sub>2</sub>S bookmark (Fig 3C). Bookmarked animals exposed to hypoxia (1,000 ppm or 5,000 ppm O<sub>2</sub>; room air is 210,000 ppm oxygen) or heat shock survived exposure to high H<sub>2</sub>S as well as controls that remained in normal growth conditions. This result supports our assertion that the H<sub>2</sub>S bookmark is distinct from other general stress responses. Moreover, as hypoxia has dramatic effects to decrease protein translation and metabolic activity, this result suggests that maintenance of the H<sub>2</sub>S bookmark is not dependent on these processes.

### *H<sub>2</sub>S bookmarking facilitates transcriptional reactivation of H<sub>2</sub>S responsive genes*

One possible mechanism of H<sub>2</sub>S bookmarking could be that genes induced by exposure to low H<sub>2</sub>S persist, and are therefore able to promote survival in subsequent H<sub>2</sub>S exposure. We did not favor this hypothesis as the early transcriptional response to H<sub>2</sub>S depends entirely on *hif-1*, which is rapidly degraded in normal conditions (Wang et al., 1995; Kallio et al., 1999; Miller et al., 2011). To verify that H<sub>2</sub>S-induced changes in gene expression were not maintained in animals after exposure to low H<sub>2</sub>S, we first measured

expression of the SQRD-1::GFP translational reporter, which is induced by exposure to low  
 216 H<sub>2</sub>S (Budde and Roth, 2011). We exposed SQRD-1::GFP animals to low H<sub>2</sub>S for 8 hours, and  
 then removed them to house air conditions for 48 hours. Expression of SQRD-1::GFP was  
 218 significantly increased when animals were exposed to low H<sub>2</sub>S, but returned to baseline  
 levels of expression upon return to house air (Fig 4A). To corroborate our results with  
 220 SQRD-1::GFP, we measured the abundance of 12 H<sub>2</sub>S-induced transcripts (Miller et al.,  
 2011). The abundance of these transcripts in bookmarked animals 48 h after exposure to  
 222 low H<sub>2</sub>S was not significantly different from naïve controls (Fig 4B). We conclude that  
 persistent changes in gene expression do not underlie the maintenance of the H<sub>2</sub>S  
 224 bookmark.

We next considered the possibility that the H<sub>2</sub>S bookmark functions to potentiate  
 226 H<sub>2</sub>S-induced changes in gene expression upon subsequent re-exposure to H<sub>2</sub>S. We  
 measured the expression of SQRD-1::GFP in naïve and bookmarked animals exposed to  
 228 high H<sub>2</sub>S for 1 hour. We chose a 1-hour exposure because previous studies showed that  
 expression of *sqr-1* is significantly upregulated after 1 hour in low H<sub>2</sub>S (Miller et al., 2011),  
 230 and naïve animals survive a 1-hour exposure to high H<sub>2</sub>S (Budde and Roth, 2011). We  
 found that the increase in SQRD-1::GFP expression was similar when naïve animals were  
 232 exposed to low or high H<sub>2</sub>S for 1 hour. In contrast, expression of SQRD-1::GFP was  
 significantly higher when animals with the H<sub>2</sub>S bookmark were exposed to high H<sub>2</sub>S (Fig  
 234 4C). This suggests that the H<sub>2</sub>S bookmark facilitates the expression of H<sub>2</sub>S-inducible genes.  
 To corroborate this result, we measured the abundance of transcripts upregulated by  
 236 exposure to low H<sub>2</sub>S (Miller et al., 2011). Eight of the 12 genes we tested were increased

more in bookmarked animals than naïve controls when exposed to high H<sub>2</sub>S (Fig 4D). We conclude that H<sub>2</sub>S bookmarking facilitates the transcriptional re-activation of H<sub>2</sub>S-responsive genes, which we refer to as bookmarked genes.

To get a more comprehensive understanding of how H<sub>2</sub>S bookmarking affected gene expression we performed RNAseq experiments to measure the abundance of transcripts in naïve and bookmarked animals exposed to high H<sub>2</sub>S. We found 16 transcripts that were upregulated in both bookmarked and naïve animals exposed to high H<sub>2</sub>S; of these, 12 were also identified in microarray experiments (Table 1; (Miller et al., 2011)). We also observed that 12 gene products were induced only in the naïve animals. None of these were upregulated in our previous microarray experiments. These genes could be induced specifically by exposure to high H<sub>2</sub>S, or it could be that they were false negatives (or missing) from the previous microarray experiment. Nevertheless, these studies suggest there is much in common between the transcriptional responses to low and high H<sub>2</sub>S.

We observed that eight transcripts were significantly more abundant in the bookmarked animals than in the naïve controls by RNA-seq (Bookmarked genes in Table 1). These results corroborated our qRT-PCR experiments (Fig 4D). In both experiments, gene products for *gst-19*, *nspe-3*, R08E5.1, *sqrd-1*, *cysl-2*, and *nit-1* were more abundant in bookmarked animals than in naïve controls. We also observed 37 transcripts that were induced by exposure to high H<sub>2</sub>S only in the bookmarked animals (Bookmark Only in Table 1). Most of these had not been previously shown to be induced by exposure to H<sub>2</sub>S. However, this group did include C31C9.2, which was bookmarked in our qRT-PCR experiments (Fig 4D), and *nspe-2*, which was upregulated in microarray experiments

(Miller et al., 2011) but not included in our qRT-PCR panel. It may be that some of these genes are minimally induced by exposure to low H<sub>2</sub>S, and do not meet our cut-offs for determining significance. Together, our data suggest a model where H<sub>2</sub>S bookmarking leads to changes in transcriptional accessibility of specific H<sub>2</sub>S-inducible genes, which facilitates robust transcriptional reactivation upon subsequent H<sub>2</sub>S exposure.

We noted that not all H<sub>2</sub>S-responsive genes were bookmarked. In both RNAseq and qRT-PCR experiments expression of three gene products, *dhs-8*, *rhy-1*, and *lgc-1*, were induced the same in bookmarked animals and naïve controls exposed to high H<sub>2</sub>S. Several other genes in our RNAseq data were also induced equally in bookmarked and naïve animals. There is no pattern we could detect that predicted whether an H<sub>2</sub>S-responsive gene would be bookmarked for transcriptional reactivation.

### *Epigenetic factors are required to maintain H<sub>2</sub>S bookmarks*

We hypothesize that there are at least two processes required for H<sub>2</sub>S bookmarking: the original formation of the bookmark, which could be related to acclimation, and maintenance of the bookmark after the end of the exposure to H<sub>2</sub>S. We were interested in the mechanism by which the bookmark was maintained, as the rapid acquisition and reversibility of the H<sub>2</sub>S bookmark suggested that it may be mediated by an epigenetic mechanism (Mirbahai and Chipman, 2014). Alternatively, it is possible that bookmarking could depend upon the persistence of a long-lived protein or small RNA, or through another uncharacterized mechanism. To distinguish between these possibilities, we performed a candidate screen to identify molecular factors that mediate H<sub>2</sub>S bookmarking.

We screened animals with genetic mutations in machinery involved in protein turnover, RNA processing, epigenetic modifications, or factors associated with environmental bookmarks in other systems (a list of all 250 candidates tested is included as Supplemental Table 1). To identify mutations that specifically disrupted the maintenance of the H<sub>2</sub>S bookmark, we exposed synchronized embryos of each mutant strain to low H<sub>2</sub>S for 8 hours, returned them to house air for 48 hours, and then exposed them to high H<sub>2</sub>S for 24 h. We selected candidates that had reduced survival after exposure to high H<sub>2</sub>S, as compared to wild-type controls that acclimate and survive the subsequent exposure to high H<sub>2</sub>S. Two of the mutations that caught our attention in this screen were *spr-5* and *set-2* (Fig 5A). For the remainder of this work we focus on these two genes, as they regulate methylation of lysine 4 on histone 3 (H3K4me) and post-translational modifications of histone proteins occupying promoters can influence transcriptional levels (reviewed in Filipescu et al., 2014).

We were most interested in mutations that disrupted the long-term maintenance of the H<sub>2</sub>S bookmark, but we expected that some of the candidates identified in the primary screen could have defects in initial acclimation to H<sub>2</sub>S and/or formation of the H<sub>2</sub>S bookmark. To exclude that *spr-5* and *set-2* were required for acclimation, we exposed each candidate strain to low H<sub>2</sub>S for 6 hours, and immediately moved them to high H<sub>2</sub>S. We reasoned that if these animals were able to acclimate to H<sub>2</sub>S that they would survive this transition. Both *spr-5* and *spr-2* mutant animals survived this treatment (Fig 5B), suggesting that acclimation was not abrogated by these mutations.

H3K4 can be mono-, di, and tri- methylated. In *C. elegans*, the histone methyltransferase SET-2 is responsible for the formation of the majority of the bulk H3K4me2 and H3K4me3 (Xiao et al., 2011). However, formation of H3K4me3 by SET-2 requires other components of the ASH-2 methyltransferase complex. The ASH-2 complex in *C. elegans* is composed of three essential subunits: SET-2, ASH-2, and WDR-5.1 (Greer et al., 2010). To determine if SET-2 was acting as part of the ASH-2 complex in H<sub>2</sub>S bookmarking, we tested whether *wdr-5.1(ok1417)* mutant animals were capable of H<sub>2</sub>S bookmarking. In contrast to *set-2(n4589)* mutant animals, we found that *wdr-5.1(ok1417)* mutant animals survived exposure to high H<sub>2</sub>S after bookmarking at levels comparable to WT controls (Fig 5A). Similarly, mutations in *rbr-2*, an H3K4me3 demethylase that antagonizes ASH-2 methyltransferase complex activity (Greer et al., 2010, #35493), has no effect on H<sub>2</sub>S bookmarking (Fig 5A). Although SET-2 is unable to mediate formation of H3K4me3 independently of the ASH-2 complex, generation of H3K4me2 does not require the ASH-2 complex (Xiao et al., 2011). We therefore favor the hypothesis that SET-2 contributes to H<sub>2</sub>S bookmarking through its activity to form H3K4me2-modified histones.

SPR-5 is a component of the histone demethylase CoREST-like complex in *C. elegans* (Eimer et al., 2002). The CoREST complex was first identified in mammals as a corepressor of the REST transcription factor. Through its histone demethylase activity, the mammalian CoREST complex mediates long-term gene repression that is essential for the maintenance of cell identity (Andrés et al., 1999). In *C. elegans* the CoREST-like complex has retained its histone demethylase activity and functions in the repression of the *hop-1* gene through demethylation of H3K4me2 at the *hop-1* gene promoter. For *hop-1* gene repression, SPR-5



interacts with the orthologue of mammalian CoREST, SPR-1, and two large proteins with weak similarity to the mammalian REST transcription factor, SPR-3 and SPR-4 (Eimer et al., 2002). While they have no clear vertebrate homologs, SPR-3 and SPR-4 are predicted to function in the recruitment of the CoREST-like corepressor complex to gene targets. To determine if SPR-5 is functioning as a part of the CoREST-like complex in H<sub>2</sub>S bookmarking, we examined the effect of a loss-of-function mutation in these other known subunits of the CoREST-like complex. We found that, like *spr-5(by134)* mutant animals, animals with mutations in *spr-1*, *spr-3*, and *spr-4* all had defects in maintaining the H<sub>2</sub>S bookmark after exposure to low H<sub>2</sub>S (Fig 5A). Taken together, these results suggest that SPR-5 functions as a member of the CoREST-like complex to mediate H<sub>2</sub>S bookmarking.

We hypothesized that the transcriptional reactivation we observed in bookmarked animals was mediated by changes in H3K4me2 status at bookmarked promoters based on the genetic requirement for *set-2* and the CoREST demethylase complex. This hypothesis predicts that *set-2(n4589)* and *spr-5(by134)* mutant animals would not be able to effectively reactivate transcription of H<sub>2</sub>S-inducible transcripts. We tested this possibility by measuring transcript abundance in *set-2(n4589)* and *spr-5(by134)* mutant animals exposed to high H<sub>2</sub>S. Both *set-2(n4589)* and *spr-5(by134)* mutant animals exposed to low H<sub>2</sub>S as embryos had defects in the transcriptional reactivation of H<sub>2</sub>S-inducible genes (Fig 6A). One trivial explanation for the lack of transcriptional reactivation of H<sub>2</sub>S-inducible genes in the *set-2* and *spr-5* mutant animals is that they are generally unable to induce gene expression in response to H<sub>2</sub>S. We considered this unlikely, as both *set-2(n4589)* and *spr-5(by134)* mutant animals survive prolonged exposure to low H<sub>2</sub>S as well as wild-type

animals. Indeed, we found no difference in the initial transcriptional response to low sulfide in either *set-2(n4589)* or *spr-5(by134)* mutant animals (Fig 6B). Moreover, both *set-2(n4589)* and *spr-5(by134)* mutant animals upregulated H<sub>2</sub>S-responsive genes as effectively as wild-type controls when exposed to high H<sub>2</sub>S after acclimation (Fig 6C). These results indicate that neither *set-2* nor *spr-5* are required for the normal transcriptional response or acclimatization to H<sub>2</sub>S. Instead, our data show that these histone-modifying enzymes are specifically required for the maintenance of the H<sub>2</sub>S bookmark and associated transcriptional reactivation of bookmarked genes.

## Discussion

We have discovered a novel environmental bookmark to H<sub>2</sub>S that enhances survival when animals re-encounter H<sub>2</sub>S in the environment. Our experiments suggest that H<sub>2</sub>S exposure leads to formation of a bookmark that has persistent effects on the epigenetic landscape, allowing for enhanced transcriptional responses and increased survival upon subsequent H<sub>2</sub>S exposure.

To our knowledge, our studies demonstrate the first example of reversal of a stress-induced epigenetic bookmark by fasting. The molecular nature of the interaction between fasting and H<sub>2</sub>S bookmarking is not yet clear. In mammals, changes in diet, including periods of fasting, can lead to dramatic changes in the epigenome, including the reversal of epigenetic bookmarks (Burdge and Lillycrop, 2010). The ability to erase, or modulate, epigenetic bookmarks on demand has important implications in treatment of human disease by therapeutic intervention. Offspring of malnourished mothers can carry

bookmarks that can lead to diabetes or obesity if food is abundant, which can reduce fertility (Gluckman et al., 2008). Maternal undernutrition during pregnancy, which results in epigenetic modifications to offspring that are designed to protect against subsequent famine, is associated with greater susceptibility to cancer in rats (Fernandez-Twinn et al., 2007). Our discovery of epigenetic bookmarking by H<sub>2</sub>S exposure provides a uniquely tractable model to develop strategies to modulate epigenetic marks in animals.

We propose that the H<sub>2</sub>S bookmark is related to the methylation status of histone H3K4, based on the genetic requirement for SET-2 and SPR-5 in maintaining the H<sub>2</sub>S bookmark. As SET-2 and SPR-5/CoREST both alter methylation status of H3K4me<sub>2</sub>, one simple model is that these two enzymes cooperate at the promoters of bookmarked animals to facilitate transcriptional reactivation. However, this interpretation is complicated by the fact that mutations in *set-2* and *spr-5* do not have entirely overlapping effects. For example, while transcriptional reactivation of *gst-19* and *nspe-3* was abrogated in both *spr-5* and *set-2* mutant animals, the bookmarking of *nhr-57*, *nit-1*, *C31C9.2*, and *R08E5.1* was lost only in *set-2* animals (Fig 5C). Moreover, some bookmarked genes were not affected in either *set-2(n4589)* or *spr-5(by134)* mutant animals. Future genome-wide studies of histone methylation status and the epigenetic effects of H<sub>2</sub>S are necessary to understand how these two histone-modifying enzymes are coordinated.

Our finding that H<sub>2</sub>S bookmarking requires histone methylation machinery is reminiscent of other established examples of epigenetic bookmarks. In plants, multiple rounds of drought stress lead to increased H3K4me<sub>3</sub>, providing resistance to subsequent severe droughts (Ding et al., 2012). Additionally, trithorax (TrxG) proteins with histone

390 methyltransferase activity function in the epigenetic bookmarking of low winter  
temperatures in plants, which alters the timing of vernalization in subsequent seasons  
392 (Buzas et al., 2012; Song et al., 2012). The complexity and pleiotropic nature of  
environmental bookmarks has made understanding the mechanistic underpinnings of  
394 epigenetic bookmarks difficult, particularly in animals. Although not necessarily a  
bookmark, *C. elegans*, that enter into the alternative dauer larval stage have decreased in  
396 H3K4me3 and H4 acetylation in the adult animal, resulting in persistent changes in endo-  
siRNA levels that can poise genes for activation upon subsequent encounters with  
398 environmental stress (Hall et al., 2010).

The genetic factors required to maintain the H<sub>2</sub>S bookmark in *C. elegans*, SET-2 and  
400 SPR-5, are conserved through humans. Though to our knowledge H<sub>2</sub>S has not yet been  
shown to have epigenetic effects in mammals, H<sub>2</sub>S is a commonly encountered  
402 environmental toxin produced by oil refineries and paper mills that has dramatic effects on  
neurological, respiratory and cardiovascular function, even at low concentrations (Kilburn  
404 and Warshaw, 1995; Richardson, 1995; Bates et al., 2002). We demonstrate that H<sub>2</sub>S  
concentrations as low as 15 ppm, which is below OSHA limits for industrial exposure, can  
406 lead to the establishment of an H<sub>2</sub>S bookmark in *C. elegans*. It will be important to learn if  
H<sub>2</sub>S has similar effects in mammals, as this information could inform future toxic risk  
408 assessment to improve worker safety.

## 410 **Materials and Methods**

*C. elegans* were maintained on nematode growth media (NGM) with OP50 *E. coli* at 20°C

(Brenner, 1974). Worm strains used in this study are listed in Supplementary Table 1.

#### *Constructing defined gaseous environments*

All compressed gas tanks were purchased from Airgas (Seattle, WA) and certified standard to 2% of target gas concentration, with the balance N<sub>2</sub>. Tanks with O<sub>2</sub> contained 1,000 or 5,000 ppm, and H<sub>2</sub>S source tanks were 5,000 ppm. Gaseous environments were maintained using continuous flow chambers as described in (Fawcett et al., 2012). H<sub>2</sub>S was diluted from a 5,000 ppm stock tank with house air as in (Miller and Roth, 2007). H<sub>2</sub>S environments were maintained in a fume hood at 20°C, with matched house air (without H<sub>2</sub>S) continuous flow environments.

#### *H<sub>2</sub>S bookmarking assay*

Embryos were synchronized by allowing gravid adults to lay eggs for 2 h on seeded NGM plates. First stage larvae (L1) were collected 24 h post egg-lay, L2 after 36 h, and L3s after 48 hours at 20°C on seeded NGM plates. L4 animals were picked from well-fed, logarithmically growing cultures and moved to seeded NGM plates. Staged animals were immediately exposed to 50 ppm H<sub>2</sub>S for indicated amount of time, and then removed to house air for 48 hours. Animals were then exposed to 150 ppm H<sub>2</sub>S overnight (~16 hours) and then scored for survival. Data was reported as % animals alive after 150 ppm H<sub>2</sub>S +/- standard deviation. Bagged animals were censored from the experiment. For differences

between genotypes, p-values were calculated by one-way ANOVA using summary statistics (mean, standard deviation, n).

To evaluate the effects of other conditions on bookmarks, 24 h after the adaptation period animals were moved to hypoxia (1,000 or 5,000 ppm O<sub>2</sub> for 24 h) or heat-shock (37 C for 1 h). For fasting, animals were moved to unseeded NGM plates with 25 mg/L carbenicillin to prevent bacterial growth. After 10 minutes, animals were moved to a new unseeded NGM plate with 25 mg/L carbenicillin to further deplete the food associated with their cuticle. Palmitic acid (10 mg mL<sup>-1</sup> in ethanol) was used to form a physical barrier around the edge of each plate to encourage the animals to remain on the surface of the plate when fasted. After the indicated time period, animals were moved back to NGM plates seeded with live OP50 *E. coli* in room air until 48 h post-adaptation, at which time the animals were challenged with high H<sub>2</sub>S.

#### *qRT-PCR*

Animals were grown on high-growth plates seeded with NA22 *E. coli* at 20°C. When animals reached gravid adult, synchronized embryos were obtained by a 5-minute bleach in 1:1:5 water:KOH:hypochloric acid solution. For each strain/condition, ~9,000 embryos were plated onto a 150 mM NGM plate seeded with live OP50 *E. coli*. Animals were not allowed to starve out the plate at any time during the experiment. The animals were treated as for the bookmarking assay as above, except that the exposure to 150 ppm H<sub>2</sub>S was for one hour. Animals were harvested into 1 mL Trizol solution and immediately frozen in liquid nitrogen. RNA was isolated from the Trizol preparation as described

previously (Chomczynski, 1993). cDNA was made using Invitrogen SuperScript III First Strand Synthesis System. Primers were as in (Miller et al., 2011), primer sequences available upon request. qPCR was performed using Kappa SYBR FAST qPCR Kit. PCR cycle was as follows: 95C for 3 min, 95C for 15 sec, 55C for 15 sec x40. 4°C to hold.  $\Delta C_t$  for each gene product was calculated as in (Miller et al., 2011); briefly,  $\Delta C_t$  values were calculated by subtracting each measured  $C_t$  from the geometric mean of the control targets that are not altered in response to H<sub>2</sub>S (SIR-2.1, HIL-1, IRS-2, and TBA-1).  $\Delta C_t$  were averaged across experiments. Student's t-test was used to evaluate differences between  $\Delta C_t$  values of treated samples and untreated controls. For differences between genotypes, p-values were calculated with a one-way ANOVA from summary statistics (mean, standard error, n). Reported fold-changes were calculated as  $2^{-\Delta\Delta C_t}$  where  $\Delta\Delta C_t = \Delta C_t(\text{experimental condition}) - \Delta C_t(\text{control condition})$ . Error bars on graphs represent standard error of the mean, which was carried through the fold-change calculation using standard error propagation ([www.statpages.org](http://www.statpages.org)).

#### *GFP reporter quantification*

Animals were synchronized by a 2-hour egg lay of SQRD-1::GFP animals onto seeded NGM plates. Animals were adapted to H<sub>2</sub>S as described above. After 48 hours, animals were exposed to 150 ppm H<sub>2</sub>S for 1 hour. Animals were then removed to house air and allowed to recover for 1 hour to allow for folding of GFP. Roller animals, which contain the SQRD-1::GFP transgene were mounted on an agar pad in a drop of 20 mM sodium azide as anesthetic. GFP fluorescence was visualized on a Nikon 90i fluorescent microscope with the

GFP filter and oil-immersion 20x objective. All images were taken at the same exposure time and magnification. Total cell fluorescence was quantified using ImageJ software (Rasband, W.S., ImageJ, U. S. National Institutes of Health, Bethesda, Maryland, USA, <http://imagej.nih.gov/ij/>, 1997-2014). Student t-tests were used to compare mean cell fluorescence between samples.

#### *Global mRNA measurements with RNAseq*

Embryos were synchronized by allowing gravid adults to lay eggs for 2-6 hours on seeded NGM plates. Within 24 hours the plates were exposed to 50ppm for 6 hours, and then removed to house air until animals reached L4, at which time they were exposed to 150ppm H<sub>2</sub>S for 1 hour, flash frozen in liquid nitrogen, and immediately stored at -80C. RNA was isolated using Trizol, according to manufacturer's instructions, and then isopropanol precipitation. Isolated RNA was sent to Novogene for library preparation using Illumina MiSeq for paired-end sequencing. The raw data files were uploaded to the Illumina analysis cloud (BaseSpace) in order to collect raw gene counts. Differential expression of genes between conditions was determined using the edgeR analysis package on the raw gene counts (Robinson et al., 2010).

#### **Acknowledgements**

We thank our colleagues in the Miller lab that provided constructive comments to improve this manuscript and members of the NW Developmental Biology group that provided



excellent feedback on this project. We are also thankful to Dr. R. Waterston (Department of Genome Sciences, University of Washington School of Medicine) for helpful advice and Dr. C. Chatterjee (Department of Chemistry, University of Washington) for insightful discussions. Mr. Harley Childs helped initiate the candidate screens for factors involved in H<sub>2</sub>S bookmarking. This work was supported by NIH grants R00 AG033055 and R01 ES024958 to DLM. DLM is an Ellison Medical Foundation New Scholar in Aging and has been supported by the Glenn Medical Foundation. EMF was supported by NIH Developmental Biology Predoctoral Training Grant T32 HD007183 from the NICHD. JJ was an Amgen Scholar. Some strains were provided by the CGC, which is funded by NIH Office of Research Infrastructure Programs (P40 OD010440).

*Author contributions:* EMF performed experiments to characterize H<sub>2</sub>S bookmarking, identified epigenetic factors involved, and was involved in experimental design, data acquisition, analysis, and interpretation. EMF, CRB, and DLM wrote and edited early drafts of the manuscript. JKJ performed data acquisition and analysis, particularly in characterizing the effects of mutations in *set-2* and *spr-5*. EMG and CRB performed RNAseq experiments and analyzed data. DLM performed experiments in Fig. 1, planned experiments, and assisted in data analysis and interpretation. All authors edited and approved the final manuscript.

## References

Andrés ME, Burger C, Peral-Rubio MJ, Battaglioli E, Anderson ME, Grimes J, Dallman J, Ballas N, Mandel G. 1999. CoREST: a functional corepressor required for regulation of neural-specific gene expression. *PNAS* **96**: 9873–9878.

522 Bates MN, Garrett N, Shoemack P. 2002. Investigation of health effects of hydrogen sulfide  
from a geothermal source. *Arch Environ Health* **57**: 405–411.

524 Baugh LR. 2013. To grow or not to grow: nutritional control of development during  
*Caenorhabditis elegans* L1 arrest. *Genetics* **194**: 539–555.

526 Beauchamp RO, Bus JS, Popp JA, Boreiko CJ, Andjelkovich DA. 1984. A critical review of the  
literature on hydrogen sulfide toxicity. *Crit Rev Toxicol* **13**: 25–97.

528 Bos EM, van Goor H, Joles JA, Whiteman M, Leuvenink HG. 2015. Hydrogen sulfide:  
physiological properties and therapeutic potential in ischaemia. *Br J Pharmacol* **172**:  
1479–1493.

530 Brenner S. 1974. The genetics of *Caenorhabditis elegans*. *Genetics* **77**: 71–94.

532 Budde MW, Roth MB. 2011. The response of *Caenorhabditis elegans* to hydrogen sulfide and  
hydrogen cyanide. *Genetics* **189**: 521–532.

534 Budde MW, Roth MB. 2010. Hydrogen Sulfide Increases Hypoxia-inducible Factor-1 Activity  
Independently of von Hippel-Lindau Tumor Suppressor-1 in *C. elegans*. *Molecular  
Biology of the Cell* **21**: 212–217.

536 Burdge GC, Lillycrop KA. 2010. Nutrition, epigenetics, and developmental plasticity:  
implications for understanding human disease. *Annu Rev Nutr* **30**: 315–339.

538 Buzas DM, Tamada Y, Kurata T. 2012. FLC: a hidden polycomb response element shows up  
in silence. *Plant Cell Physiol* **53**: 785–793.

540 Chomczynski P. 1993. A reagent for the single-step simultaneous isolation of RNA, DNA and  
proteins from cell and tissue samples. *Biotechniques* **15**: 532–4, 536.

542 Ding Y, Fromm M, Avramova Z. 2012. Multiple exposures to drought ‘train’ transcriptional  
responses in Arabidopsis. *Nat Commun* **3**: 740.

544 Eimer S, Lakowski B, Donhauser R, Baumeister R. 2002. Loss of *spr-5* bypasses the  
requirement for the *C.elegans* presenilin *sel-12* by derepressing *hop-1*. *EMBO J* **21**: 5787–  
546 5796.

548 Fawcett EM, Hoyt JM, Johnson JK, Miller DL. 2015. Hypoxia disrupts proteostasis in  
*Caenorhabditis elegans*. *Aging Cell* **14**: 92–101.

550 Fawcett EM, Horsman JW, Miller DL. 2012. Creating Defined Gaseous Environments to  
Study the Effects of Hypoxia on *C. elegans*. *J. Vis. Exp.* (65), e4088 10.3791/4088.

- Fernandez-Twinn DS, Ekizoglou S, Gusterson BA, Luan J, Ozanne SE. 2007. Compensatory mammary growth following protein restriction during pregnancy and lactation increases early-onset mammary tumor incidence in rats. *Carcinogenesis* **28**: 545–552.
- Filipescu D, Müller S, Almouzni G. 2014. Histone H3 Variants and Their Chaperones During Development and Disease: Contributing to Epigenetic Control. *Annu. Rev. Cell Dev. Biol.* **30**: 615–646.
- Gluckman PD, Hanson MA, Cooper C, Thornburg KL. 2008. Effect of *in utero* and early-life conditions on adult health and disease. *N Engl J Med* **359**: 61–73.
- Golden JW, Riddle DL. 1984. The *Caenorhabditis elegans* dauer larva: developmental effects of pheromone, food, and temperature. *Dev Biol* **102**: 368–378.
- Greer EL, Maures TJ, Hauswirth AG, Green EM, Leeman DS, Maro GS, Han S, Banko MR, Gozani O, Brunet A. 2010. Members of the H3K4 trimethylation complex regulate lifespan in a germline-dependent manner in *C. elegans*. *Nature* **466**: 383–387.
- Hall SE, Beverly M, Russ C, Nusbaum C, Sengupta P. 2010. A cellular memory of developmental history generates phenotypic diversity in *C. elegans*. *Curr Biol* **20**: 149–155.
- Hine C, Harputlugil E, Zhang Y, Ruckenstuhl C, Lee BC, Brace L, Longchamp A, Treviño-Villarreal JH, Mejia P, Ozaki CK, Wang R, Gladyshev VN, Madeo F, Mair WB, Mitchell JR. 2015. Endogenous hydrogen sulfide production is essential for dietary restriction benefits. *Cell* **160**: 132–144.
- Ihnat MA, Thorpe JE, Kamat CD, Szabó C, Green DE, Warnke LA, Lacza Z, Cselenyák A, Ross K, Shakir S, Piconi L, Kaltreider RC, Ceriello A. 2007. Reactive oxygen species mediate a cellular ‘memory’ of high glucose stress signalling. *Diabetologia* **50**: 1523–1531.
- Kallio PJ, Wilson WJ, O’Brien S, Makino Y, Poellinger L. 1999. Regulation of the hypoxia-inducible transcription factor 1alpha by the ubiquitin-proteasome pathway. *J Biol Chem* **274**: 6519–6525.
- Kilburn KH, Warshaw RH. 1995. Hydrogen sulfide and reduced-sulfur gases adversely affect neurophysiological functions. *Toxicol Ind Health* **11**: 185–197.
- Kinoshita T, Seki M. 2014. Epigenetic memory for stress response and adaptation in plants. *Plant Cell Physiol* **55**: 1859–1863.
- Kundu S, Horn PJ, Peterson CL. 2007. SWI/SNF is required for transcriptional memory at the yeast GAL gene cluster. *Genes Dev* **21**: 997–1004.

584 McColl G, Rogers AN, Alavez S, Hubbard AE, Melov S, Link CD, Bush AI, Kapahi P, Lithgow GJ.  
2010. Insulin-like signaling determines survival during stress via posttranscriptional  
mechanisms in *C. elegans*. *Cell Metab* **12**: 260–272.

586 Miller DL, Budde MW, Roth MB. 2011. HIF-1 and SKN-1 coordinate the transcriptional  
response to hydrogen sulfide in *Caenorhabditis elegans*. *PLoS One* **6**: e25476.

588 Miller DL, Roth MB. 2009. *C. elegans* Are Protected from Lethal Hypoxia by an Embryonic  
Diapause. *Current Biology* **19**: 1233–1237.

590 Miller DL, Roth MB. 2007. Hydrogen sulfide increases thermotolerance and lifespan in  
*Caenorhabditis elegans*. *PNAS* **104**: 20618–20622.

592 Mirbahai L, Chipman JK. 2014. Epigenetic memory of environmental organisms: a reflection  
of lifetime stressor exposures. *Mutat Res Genet Toxicol Environ Mutagen* **764-765**: 10–  
594 17.

596 Richardson DB. 1995. Respiratory effects of chronic hydrogen sulfide exposure. *Am J Ind  
Med* **28**: 99–108.

598 Robinson MD, McCarthy DJ, Smyth GK. 2010. edgeR: a Bioconductor package for differential  
expression analysis of digital gene expression data. *Bioinformatics* **26**: 139–140.

600 Sen N. 2017. Functional and Molecular Insights of Hydrogen Sulfide Signaling and Protein  
Sulphydration. *J Mol Biol* **429**: 543–561.

602 Song J, Angel A, Howard M, Dean C. 2012. Vernalization - a cold-induced epigenetic switch. *J  
Cell Sci* **125**: 3723–3731.

604 Verghese J, Abrams J, Wang Y, Morano KA. 2012. Biology of the heat shock response and  
protein chaperones: budding yeast (*Saccharomyces cerevisiae*) as a model system.  
*Microbiol Mol Biol Rev* **76**: 115–158.

606 Völker U, Mach H, Schmid R, Hecker M. 1992. Stress proteins and cross-protection by heat  
shock and salt stress in *Bacillus subtilis*. *J Gen Microbiol* **138**: 2125–2135.

608 Wang GL, Jiang BH, Rue EA, Semenza GL. 1995. Hypoxia-inducible factor 1 is a basic-helix-  
loop-helix-PAS heterodimer regulated by cellular O<sub>2</sub> tension. *PNAS* **92**: 5510–5514.

610 Wu D, Wang J, Li H, Xue M, Ji A, Li Y. 2015. Role of Hydrogen Sulfide in Ischemia-  
Reperfusion Injury. *Oxid Med Cell Longev* **2015**: 186908.

612 Xiao Y, Bedet C, Robert VJ, Simonet T, Dunkelbarger S, Rakotomalala C, Soete G, Korswagen  
HC, Strome S, Palladino F. 2011. *Caenorhabditis elegans* chromatin-associated proteins

614 SET-2 and ASH-2 are differentially required for histone H3 Lys 4 methylation in  
embryos and adult germ cells. *PNAS* **108**: 8305–8310.

616

**Table 1: RNAseq comparison of gene expression in naïve and bookmarked animals.**

|                | Gene       | log <sub>2</sub> fold change |       |       | q-value |         |         | log CPM |
|----------------|------------|------------------------------|-------|-------|---------|---------|---------|---------|
|                |            | Naïve                        | Bkmk  | Bkmk  | Naïve   | Bkmk    | Bkmk    |         |
|                |            | Unexp                        | Unexp | Naïve | Unexp   | Unexp   | Naïve   |         |
| Bookmarked     | gst-19*    | 5.01                         | 8.96  | 3.95  | 1.6E-22 | 5.0E-56 | 2.7E-16 | 7.58    |
|                | nspe-3*    | 4.86                         | 8.00  | 3.14  | 5.8E-06 | 2.5E-15 | 4.6E-03 | 4.30    |
|                | nspe-4*    | 4.42                         | 7.43  | 3.01  | 1.2E-08 | 1.7E-22 | 6.1E-05 | 4.68    |
|                | sqrd-1*    | 3.86                         | 6.70  | 2.84  | 4.4E-20 | 2.6E-50 | 1.1E-11 | 6.96    |
|                | nspe-6*    | 4.92                         | 7.67  | 2.75  | 1.9E-09 | 5.4E-21 | 1.6E-03 | 4.91    |
|                | R08E5.1*   | 1.94                         | 4.54  | 2.59  | 5.0E-04 | 4.7E-24 | 1.0E-08 | 4.24    |
|                | nit-1*     | 2.73                         | 4.95  | 2.22  | 3.6E-12 | 3.6E-36 | 2.8E-08 | 6.72    |
|                | cysl-2*    | 2.00                         | 4.04  | 2.04  | 1.1E-05 | 6.7E-23 | 8.2E-06 | 8.85    |
| Not Bookmarked | dhs-8*     | 3.20                         | 4.33  | 1.13  | 1.5E-08 | 8.6E-16 | 1.0E+00 | 4.45    |
|                | nhr-62     | 1.84                         | 2.83  | 0.99  | 4.6E-03 | 1.3E-08 | 1.0E+00 | 4.06    |
|                | cdo-1      | 1.40                         | 2.31  | 0.91  | 4.8E-04 | 8.0E-13 | 2.9E-01 | 5.95    |
|                | M05D6.6    | 1.50                         | 2.33  | 0.83  | 1.0E-04 | 8.0E-13 | 6.3E-01 | 7.25    |
|                | rhy-1*     | 4.44                         | 5.06  | 0.62  | 2.6E-28 | 6.1E-36 | 1.0E+00 | 8.21    |
|                | lgc-1*     | 3.30                         | 3.67  | 0.37  | 1.0E-02 | 6.7E-04 | 1.0E+00 | 0.45    |
|                | gbh-2      | 1.41                         | 1.46  | 0.05  | 2.9E-03 | 8.1E-04 | 1.0E+00 | 5.08    |
|                | nhr-57*    | 4.16                         | 3.43  | -0.73 | 5.0E-28 | 2.7E-20 | 1.0E+00 | 5.65    |
| Naïve Only     | hsp-70     | 4.06                         | 0.54  | -3.52 | 3.3E-05 | 1.0E+00 | 7.0E-04 | 6.22    |
|                | R11A5.3    | 4.04                         | 0.72  | -3.32 | 6.0E-06 | 1.0E+00 | 4.6E-04 | 2.41    |
|                | hsp-16.2   | 3.43                         | 0.79  | -2.65 | 6.3E-04 | 1.0E+00 | 3.7E-02 | 5.23    |
|                | nhr-17     | 2.89                         | 0.33  | -2.56 | 3.6E-12 | 1.0E+00 | 2.1E-09 | 4.88    |
|                | cpn-3      | 2.15                         | 0.49  | -1.65 | 1.9E-04 | 1.0E+00 | 2.3E-02 | 4.01    |
|                | lact-4     | 1.97                         | 0.81  | -1.16 | 1.8E-08 | 6.3E-01 | 2.2E-02 | 5.65    |
|                | ugt-8      | 1.85                         | 1.07  | -0.78 | 1.1E-03 | 6.8E-01 | 1.0E+00 | 4.57    |
|                | C06B3.6    | 1.84                         | 1.16  | -0.68 | 4.3E-04 | 2.4E-01 | 1.0E+00 | 4.64    |
|                | egl-9      | 1.71                         | 1.01  | -0.70 | 7.3E-06 | 9.8E-02 | 1.0E+00 | 5.47    |
|                | aip-1      | 1.69                         | 0.48  | -1.21 | 8.5E-06 | 1.0E+00 | 1.7E-02 | 5.86    |
|                | cbs-1      | 1.67                         | -0.03 | -1.70 | 9.5E-03 | 1.0E+00 | 7.5E-03 | 5.28    |
|                | scp-1      | 1.37                         | 0.15  | -1.23 | 4.6E-03 | 1.0E+00 | 2.9E-02 | 6.06    |
| Bookmark Only  | H12D21.6   | 3.45                         | 5.40  | 1.95  | 1.7E-01 | 4.9E-07 | 3.6E-01 | -0.31   |
|                | B0462.4    | 2.36                         | 5.39  | 3.03  | 4.4E-02 | 2.6E-14 | 3.8E-05 | 2.66    |
|                | ptr-22     | 2.45                         | 4.88  | 2.43  | 1.6E-01 | 2.0E-07 | 1.4E-01 | 3.63    |
|                | R08F11.4   | 0.71                         | 4.83  | 4.12  | 1.0E+00 | 7.0E-12 | 1.3E-08 | 3.37    |
|                | ugt-14     | 2.33                         | 4.22  | 1.89  | 9.1E-02 | 2.0E-07 | 4.0E-01 | 2.55    |
|                | R08E5.3    | 1.47                         | 3.98  | 2.51  | 1.2E-02 | 9.3E-22 | 1.0E-08 | 9.26    |
|                | C08E8.3    | 2.51                         | 3.98  | 1.46  | 1.5E-02 | 3.2E-08 | 8.5E-01 | 1.60    |
|                | nspe-2*    | 1.57                         | 3.61  | 2.04  | 9.3E-02 | 6.2E-12 | 1.7E-03 | 5.00    |
|                | gst-30     | 1.10                         | 3.29  | 2.19  | 1.0E+00 | 1.1E-03 | 2.7E-01 | 1.09    |
|                | mpst-3     | 0.88                         | 3.29  | 2.40  | 6.0E-01 | 2.2E-21 | 3.5E-11 | 6.40    |
|                | ethe-1     | 0.92                         | 3.15  | 2.23  | 1.0E+00 | 1.4E-09 | 1.7E-04 | 3.88    |
|                | Y37A1B.5   | 1.05                         | 2.90  | 1.85  | 4.4E-01 | 8.0E-13 | 1.1E-04 | 8.31    |
|                | C08E8.10   | 1.09                         | 2.87  | 1.78  | 1.0E+00 | 7.1E-06 | 8.5E-02 | 3.46    |
|                | comt-4     | 2.55                         | 2.74  | 0.19  | 2.1E-02 | 3.5E-03 | 1.0E+00 | 0.70    |
|                | cysl-3     | 0.67                         | 2.69  | 2.02  | 1.0E+00 | 1.1E-13 | 3.2E-07 | 6.98    |
|                | gst-16     | -0.03                        | 2.51  | 2.54  | 1.0E+00 | 2.4E-03 | 3.8E-03 | 1.80    |
|                | M05D6.5    | 1.14                         | 2.48  | 1.34  | 1.4E-02 | 2.8E-15 | 7.0E-04 | 6.50    |
|                | C31C9.2*   | 0.69                         | 2.41  | 1.72  | 1.0E+00 | 3.9E-09 | 4.6E-04 | 9.15    |
|                | glb-1      | 1.16                         | 2.38  | 1.21  | 1.1E-01 | 1.4E-09 | 7.3E-02 | 5.30    |
|                | M162.5     | 0.52                         | 2.30  | 1.78  | 1.0E+00 | 1.2E-05 | 7.0E-03 | 3.95    |
|                | cyp-36A1   | 1.43                         | 2.29  | 0.86  | 9.3E-02 | 6.2E-06 | 1.0E+00 | 3.94    |
|                | F29C6.1    | 1.00                         | 2.27  | 1.27  | 2.9E-01 | 8.0E-10 | 2.2E-02 | 5.99    |
|                | F59B10.4   | 1.36                         | 2.25  | 0.89  | 7.7E-01 | 1.0E-03 | 1.0E+00 | 3.02    |
|                | dpy-17     | 1.23                         | 2.25  | 1.02  | 1.0E+00 | 1.8E-03 | 1.0E+00 | 4.10    |
|                | nhr-11     | 0.54                         | 2.16  | 1.62  | 1.0E+00 | 9.3E-05 | 3.2E-02 | 3.85    |
|                | F26H9.5    | 0.84                         | 2.14  | 1.30  | 1.0E+00 | 7.0E-08 | 2.9E-02 | 8.09    |
|                | F56D5.3    | 0.91                         | 1.98  | 1.07  | 1.0E+00 | 5.2E-03 | 1.0E+00 | 3.58    |
|                | F54D8.6    | 0.31                         | 1.83  | 1.52  | 1.0E+00 | 1.8E-07 | 1.4E-04 | 7.09    |
|                | gst-4      | 0.37                         | 1.68  | 1.31  | 1.0E+00 | 3.1E-04 | 3.9E-02 | 5.10    |
|                | Y62E10A.13 | 0.32                         | 1.63  | 1.31  | 1.0E+00 | 1.2E-03 | 6.3E-02 | 8.12    |
|                | pck-1      | 0.78                         | 1.58  | 0.81  | 1.0E+00 | 4.7E-03 | 1.0E+00 | 8.81    |
|                | C39E9.8    | 0.73                         | 1.57  | 0.84  | 1.0E+00 | 3.5E-03 | 1.0E+00 | 7.33    |
|                | C17C3.1    | 0.74                         | 1.48  | 0.74  | 1.0E+00 | 2.3E-04 | 1.0E+00 | 5.83    |
|                | acs-2      | 1.06                         | 1.37  | 0.30  | 2.0E-01 | 5.2E-03 | 1.0E+00 | 5.78    |
|                | cysl-1     | 0.34                         | 1.33  | 0.99  | 1.0E+00 | 7.1E-04 | 1.2E-01 | 6.73    |
|                | lips-10    | 0.58                         | 1.33  | 0.74  | 1.0E+00 | 4.1E-03 | 1.0E+00 | 6.50    |
|                | Y11D7A.10  | 0.19                         | 1.19  | 1.00  | 1.0E+00 | 3.5E-03 | 8.6E-02 | 6.40    |

Table 1: Differentially regulated genes after exposure to high H<sub>2</sub>S identified by RNAseq. Bookmarked genes were upregulated significantly more in animals previously exposed to low H<sub>2</sub>S than in naïve controls (but were induced by exposure to high H<sub>2</sub>S in the naïve animals). Not bookmarked genes were upregulated the same in treated animals and naïve controls. Naïve only genes upregulated only in the previously untreated controls. Bookmark only genes were significantly induced only in animals that had previously been exposed to low H<sub>2</sub>S.

## A. Physiological memory of H<sub>2</sub>S exposure

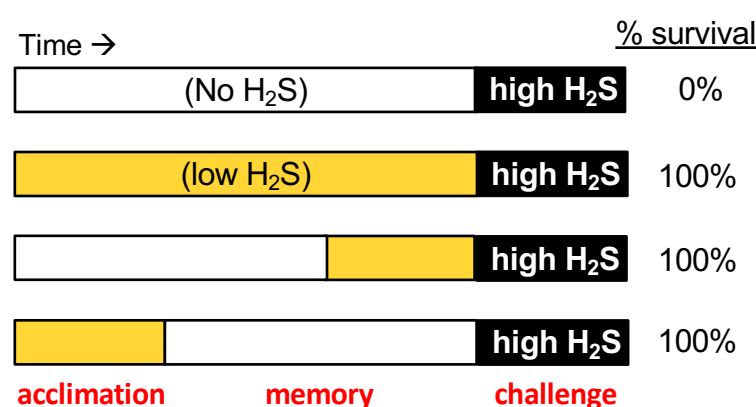

## C. Hypoxia can induce acclimation

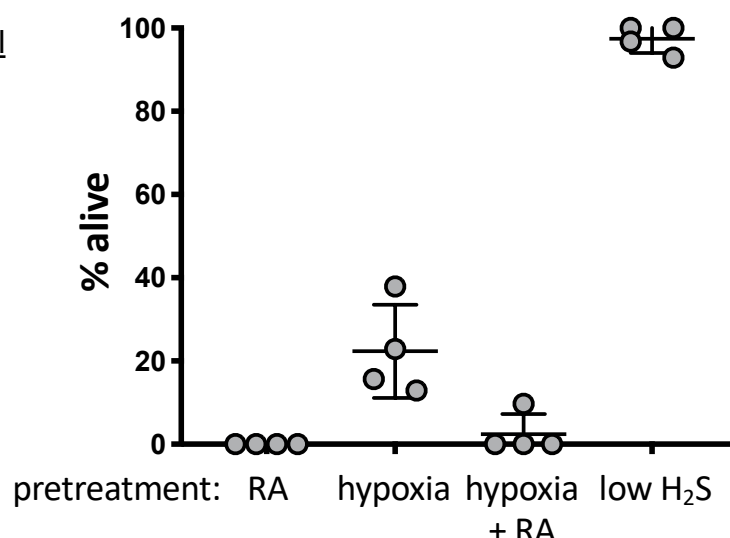

## B. Bookmarking is time and dose dependent

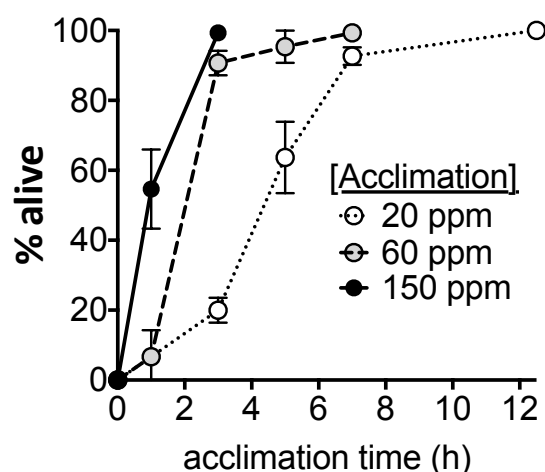

**Fig 1: Exposure to low H<sub>2</sub>S induces an environmental bookmark.**

A. Survival of animals exposed to high H<sub>2</sub>S (black). In the schematic, time in low H<sub>2</sub>S is colored yellow, time in room air without H<sub>2</sub>S is white, and black indicates when animals were challenged with exposure to high H<sub>2</sub>S. TOP ROW: Naïve animals grown in the absence of H<sub>2</sub>S (open white). SECOND ROW, animals grown in low H<sub>2</sub>S (50 ppm) throughout development. THIRD ROW: Animals exposed to low H<sub>2</sub>S for 6 h as L4 and then immediately moved to high H<sub>2</sub>S. BOTTOM ROW: Embryos exposed to low H<sub>2</sub>S for 6 h, and then raised in room air without H<sub>2</sub>S for 48 h. As noted in red below the bottom row, we refer to the initial exposure to low H<sub>2</sub>S as acclimation, time in the absence of H<sub>2</sub>S as the memory period, and the subsequent exposure to high H<sub>2</sub>S as the challenge. Each exposure was repeated at least three times with at least 30 animals in each cohort.

B. Time-dose response to form the H<sub>2</sub>S bookmark. Animals were acclimated to each indicated concentrations of H<sub>2</sub>S for the indicated time as L1, then challenged with 150 ppm H<sub>2</sub>S as L4.

C. Survival of animals exposed to 150 ppm H<sub>2</sub>S after previous exposure to hypoxia. Wild-type L4 animals were exposed to 5,000 ppm O<sub>2</sub> for 5h and then either moved directly to high H<sub>2</sub>S (hypoxia) or allowed to recover in room air for 3h before exposure to high H<sub>2</sub>S (hypoxia + RA). Control animals remained in room air (RA) or were exposed to low H<sub>2</sub>S for 5 h (low H<sub>2</sub>S). Each point is the average survival from one independent experiment with at least 30 animals in each cohort for each experiment. Lines indicate the mean and standard deviation of the four independent experiments.



## A. H<sub>2</sub>S bookmarking during development

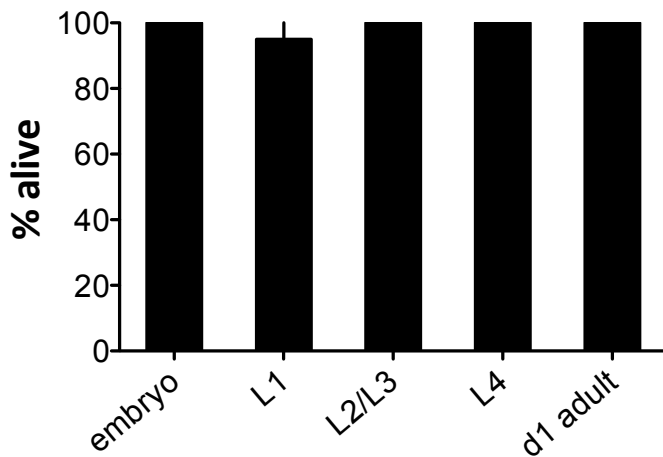

## C. Bookmarking in aging animals.

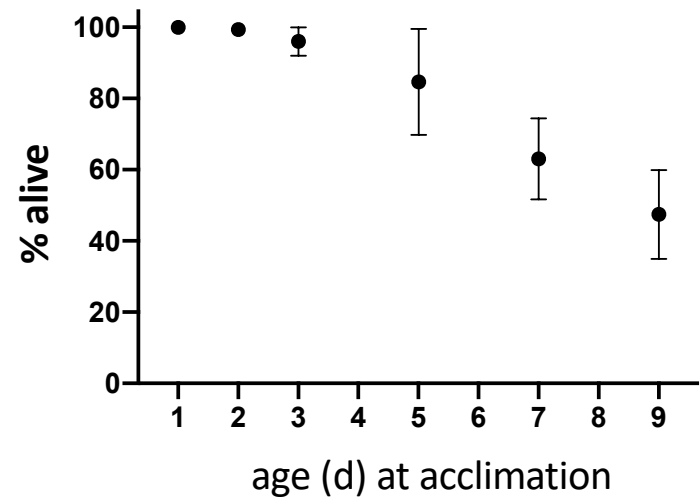

## B. Persistence of the H<sub>2</sub>S bookmark

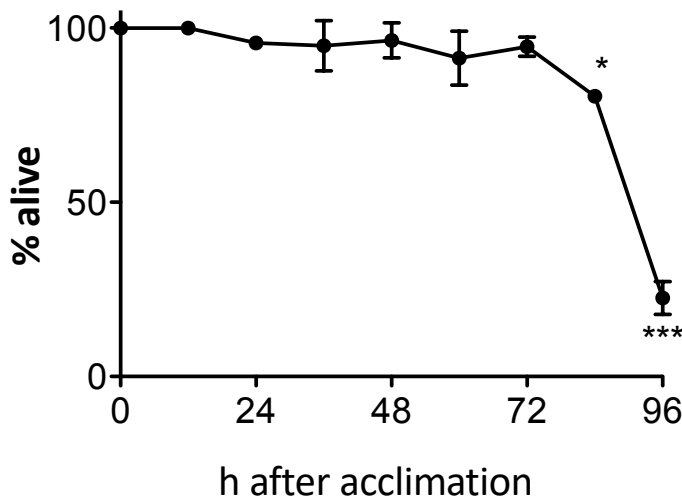

**Fig 2: H<sub>2</sub>S bookmarks are persistent but reverse spontaneously with age.**

A. H<sub>2</sub>S bookmarking during development. Animals at each developmental stage were exposed to low H<sub>2</sub>S for 4 h, then returned to room air for 48 h before challenge with high H<sub>2</sub>S.

B. H<sub>2</sub>S bookmark persistence. Animals were exposed to low H<sub>2</sub>S for 12 h as embryos and then returned to room air for the indicated period of time before challenge with high H<sub>2</sub>S.

C. Bookmarking in aging animals. Animals were exposed to low H<sub>2</sub>S for 12 h at the indicated age, then returned to room air for 48 h before challenge with high H<sub>2</sub>S. For all panels, each experiment was repeated independently at least 4 times with 30-40 animals in each cohort.

Error bars are standard deviation of the mean.

### A. Bookmarking is reversed in starved L1.

### B. H<sub>2</sub>S exposure does not form bookmarks in starved L1

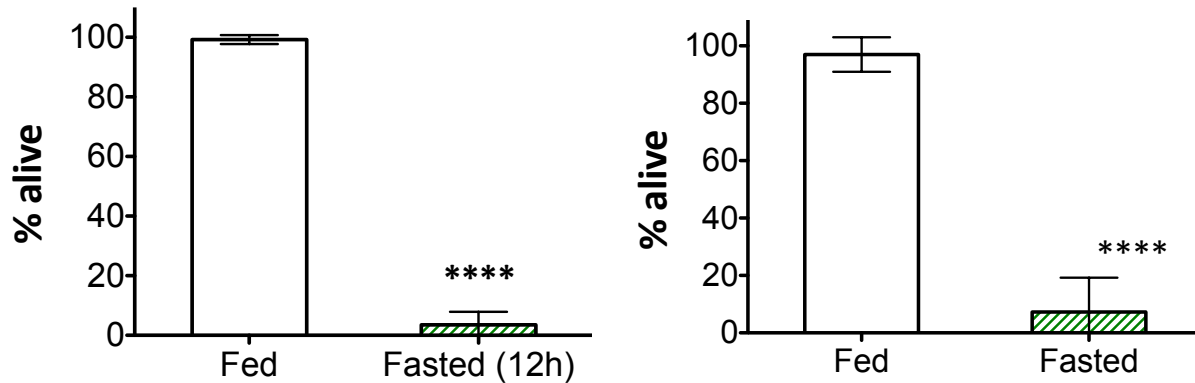

### C. Fasting reverses H<sub>2</sub>S bookmarking.

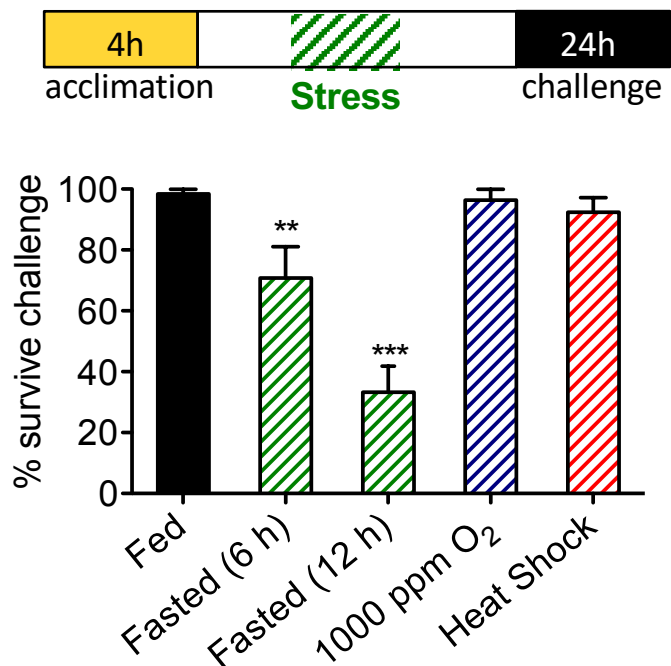

**Fig 3: Fasting erases H<sub>2</sub>S bookmarks.**

A. Survival of animals exposed to high H<sub>2</sub>S when acclimated as embryos. Embryos were acclimated to low H<sub>2</sub>S for 4 h, then allowed to hatch in the presence or absence of food. After 12 h, L1 that hatched without food were moved to plates with food. When animals were L4 they were challenged with high H<sub>2</sub>S.

B. Survival of animals acclimated to H<sub>2</sub>S in the absence of food. Embryos isolated from naïve adults were allowed to hatch in the absence of food overnight. Starved L1 were moved to plates ± food, then exposed to low H<sub>2</sub>S for 12 h. All animals were returned to house air and grown to L4/young adult on plates with food, then challenged with high H<sub>2</sub>S.

C. H<sub>2</sub>S bookmarking is reversed by fasting, but not other stress responses. As indicated in the schematic, animals were exposed to low H<sub>2</sub>S for 4 h as embryos, then returned to room air. During the 48 h recovery time animals were transiently exposed to food deprivation (fasted; green), hypoxia (blue; 1,000 ppm O<sub>2</sub> for 24h), or heat shock (red; 37 °C for 1 h). The animals were then challenged with high H<sub>2</sub>S as L4/young adult. In all panels, graphs show mean survival ± standard deviation of at least 5 independent experiments with 30-40 animals in each experiment. \*\*\*\*, p < 0.0001; \*\*, p < 0.01.

## Figure 4

### A. SQRD-1::GFP expression

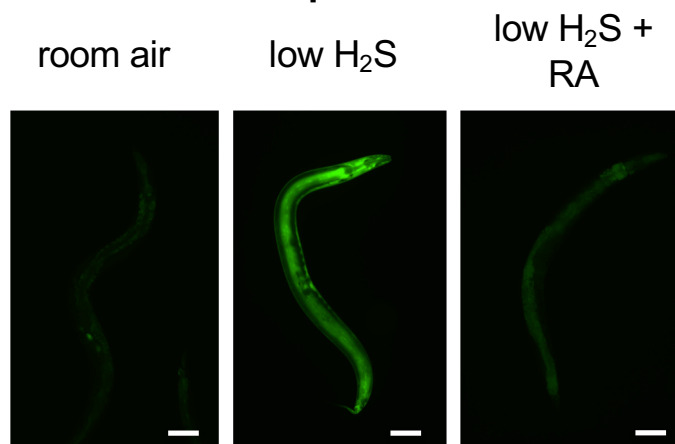

### B. Transcript abundance of H<sub>2</sub>S-induced genes 48 h after acclimation

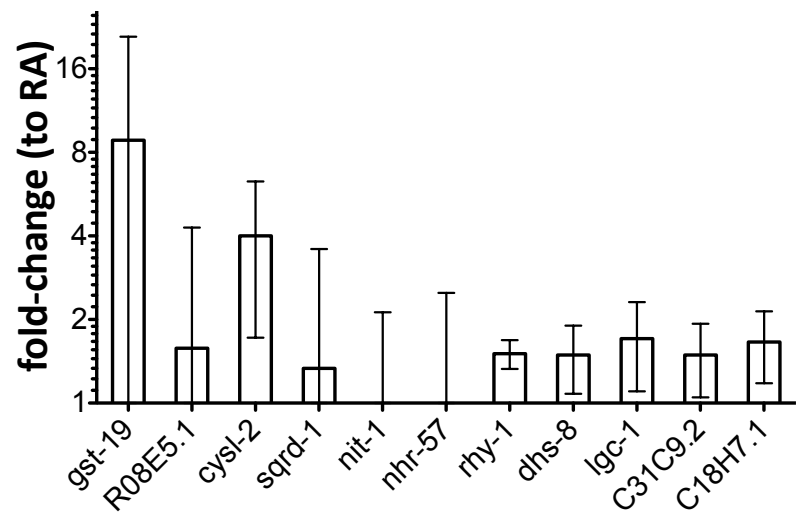

### C. Reactivation of SQRD-1::GFP expression in bookmarked animals

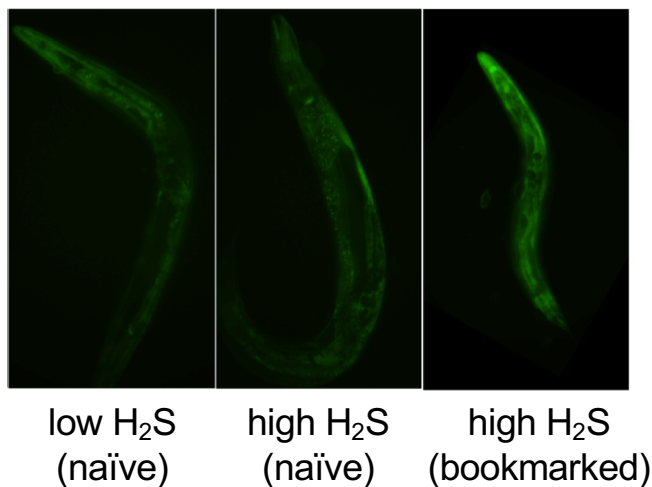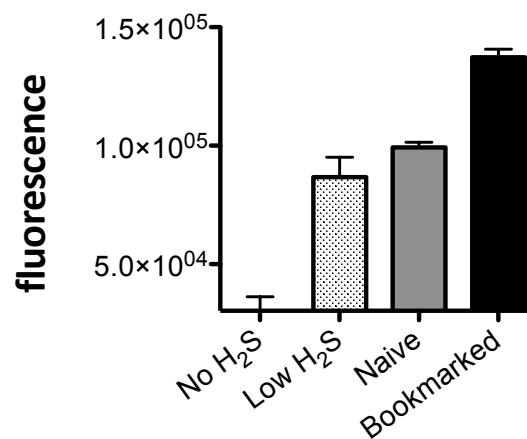

### D. Reactivation of H<sub>2</sub>S-induced genes in bookmarked animals.

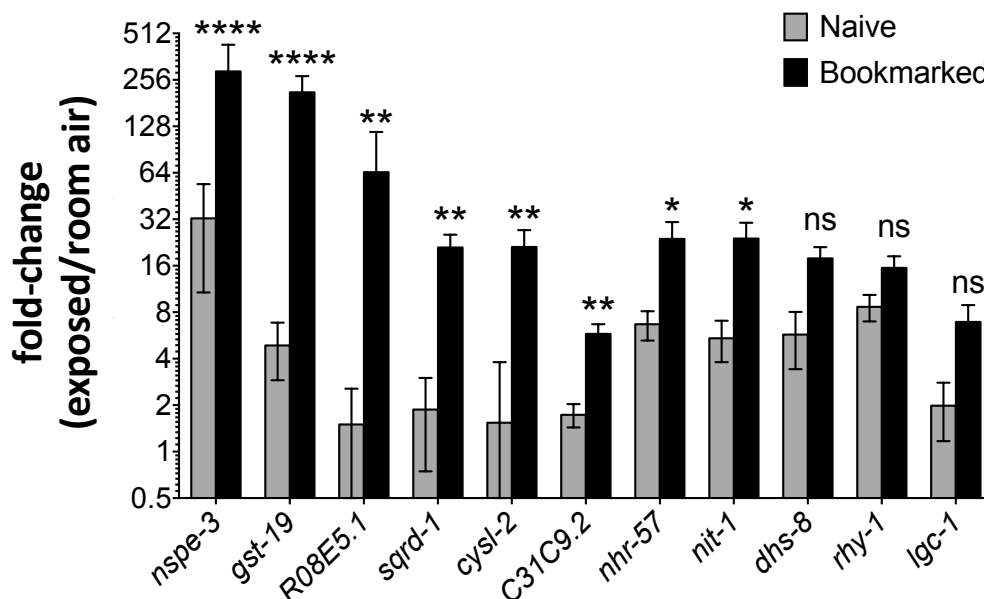

**Fig 4: H<sub>2</sub>S bookmarking is associated with transcriptional reactivation of H<sub>2</sub>S-induced genes.**

A. Representative images showing expression of the SQRD-1::GFP translational fusion protein in the absence of H<sub>2</sub>S (room air; left), after 8 h in low H<sub>2</sub>S (middle), and then 48 h after return to room air (right). In all images anterior is toward the top.

B. qRT-PCR measurement of abundance of mRNA from known H<sub>2</sub>S-induced genes. Animals were exposed to low H<sub>2</sub>S for 12 h and then returned to room air for 48 h. Graph shows mean transcript abundance relative to room air controls. Error bars are standard deviation of at least three experimental replicates. ns: not significant.

C. Representative images showing expression of the SQRD-1::GFP translational reporter in naïve animals exposed to low or high H<sub>2</sub>S, and in bookmarked animals exposed to high H<sub>2</sub>S. All animals were first-day adults. Representative images are shown, with measured fluorescence intensity of cohorts of 30-40 animals shown in the graph.

D. Transcriptional reactivation of H<sub>2</sub>S-inducible genes in bookmarked animals. Transcript abundance of known H<sub>2</sub>S-inducible genes was measured by qRT-PCR after animals were exposed to high H<sub>2</sub>S for 1 h. The change in transcript abundance relative to untreated controls is shown for naïve and bookmarked animals. Mean  $\pm$  standard deviation is shown. \*\*\*\*, p-value < 0.0001; \*\*, p-value < 0.01; \*, p-value < 0.05; ns, not significant.

## Figure 5

Fawcett et al.

### A. *set-2* and the CoREST-like complex are required to maintain H<sub>2</sub>S bookmarking

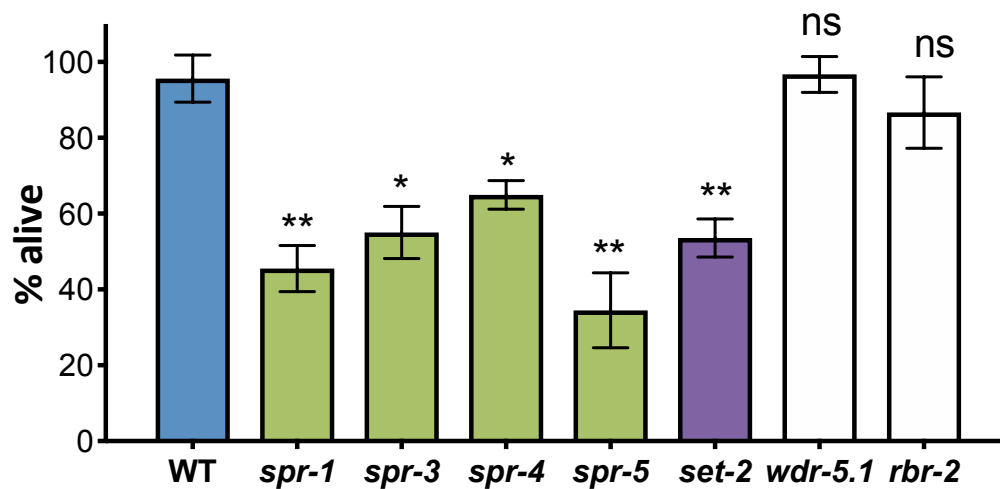

### B. *set-2* and *spr-5* are not required for acclimation to H<sub>2</sub>S

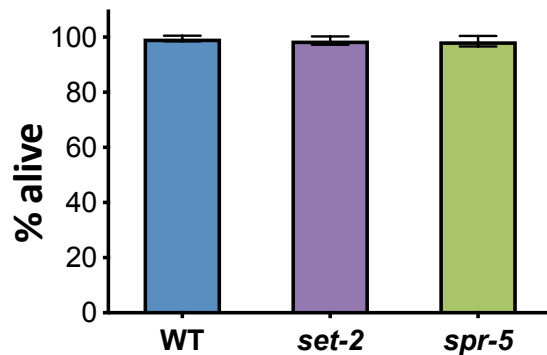

**Fig 5: The SET-2 histone demethylase and CoREST histone methyltransferase are required to maintain H<sub>2</sub>S bookmarking.**

A. Bookmarking defects of *set-2* and CoREST-like complex members. Animals were exposed to low H<sub>2</sub>S for 4 h as embryos, then grown in room air for 48 h. Survival of challenge in high H<sub>2</sub>S is shown. The *set-2* (purple) and *spr-5* (green) mutant phenotypes were found in a candidate screen of 250 genes (listed in Supplementary Table 1). *spr-5*, *spr-1*, *spr-3*, and *spr-4* are members of the CoREST-like complex, *wdr-5.1* is a component of the ASH complex, and *rbr-2* is a histone demethylase that counteracts the ASH methyltransferase (see references in main text). Graph shows mean  $\pm$  standard deviation of at least 5 independent experiments with 30-40 animals in each cohort.

B. Acclimation of *set-2* and *spr-5* mutant animals. Animals were exposed to low H<sub>2</sub>S for 8h as L4 and then moved directly to high H<sub>2</sub>S overnight. Average survival is shown. Error bars are standard deviation of the mean. Graph shows mean  $\pm$  standard deviation of at least 5 independent experiments with 30-40 animals in each cohort.

## Figure 6

Fawcett et al.

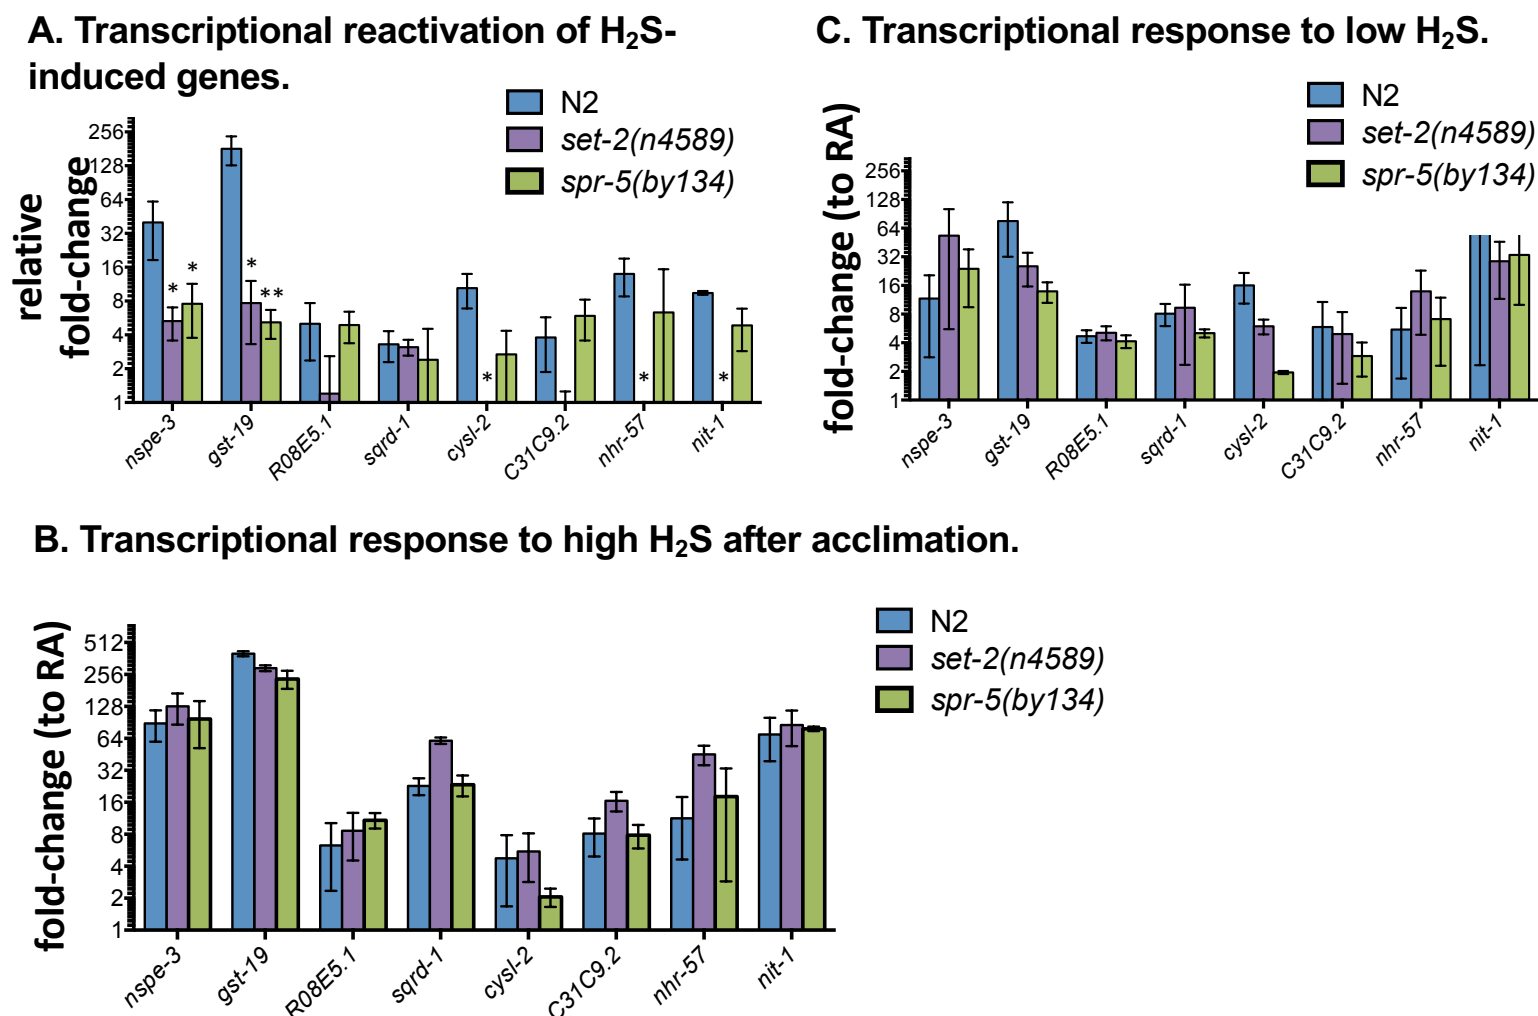

**Fig 6: Transcriptional reactivation in bookmarked animals requires *set-2* and *spr-5*.**

A. Transcript levels were measured by qRT-PCR for naïve and bookmarked animals exposed to high H<sub>2</sub>S for 1 h. The relative fold-change of transcript abundance ( $\Delta\Delta C_t(\text{bookmarked}) / \Delta\Delta C_t(\text{naïve})$ ) is shown  $\pm$  standard deviation. In all panels, N2 is in blue, *set-2(n4589)* is in purple, and *spr-5(by134)* is in green. In all panels \*\*\*\*, p-value < 0.0001; \*\*, p-value < 0.01; \*, p-value < 0.05; if not indicated, not significant.

B. The initial transcriptional response to low H<sub>2</sub>S does not require *set-2* or *spr-5*. Transcript abundance for each H<sub>2</sub>S-inducible gene was measured in *set-2(n4589)* and *spr-5(by134)* mutant animals after 1 h exposure to low H<sub>2</sub>S. Graph shows mean change in transcript abundance, relative to untreated controls ( $\Delta\Delta C_t \pm$  standard deviation).

C. *set-2* and *spr-5* mutant animals can be preconditioned to H<sub>2</sub>S. Animals of each genotype were exposed to low H<sub>2</sub>S for 24 h, then moved to high H<sub>2</sub>S for 1 h. The transcriptional response of these preconditioned animals is not distinguishable from wild-type controls. Graph shows  $\Delta\Delta C_t \pm$  standard deviation.

## Supplemental Figure 1

Fawcett et al.

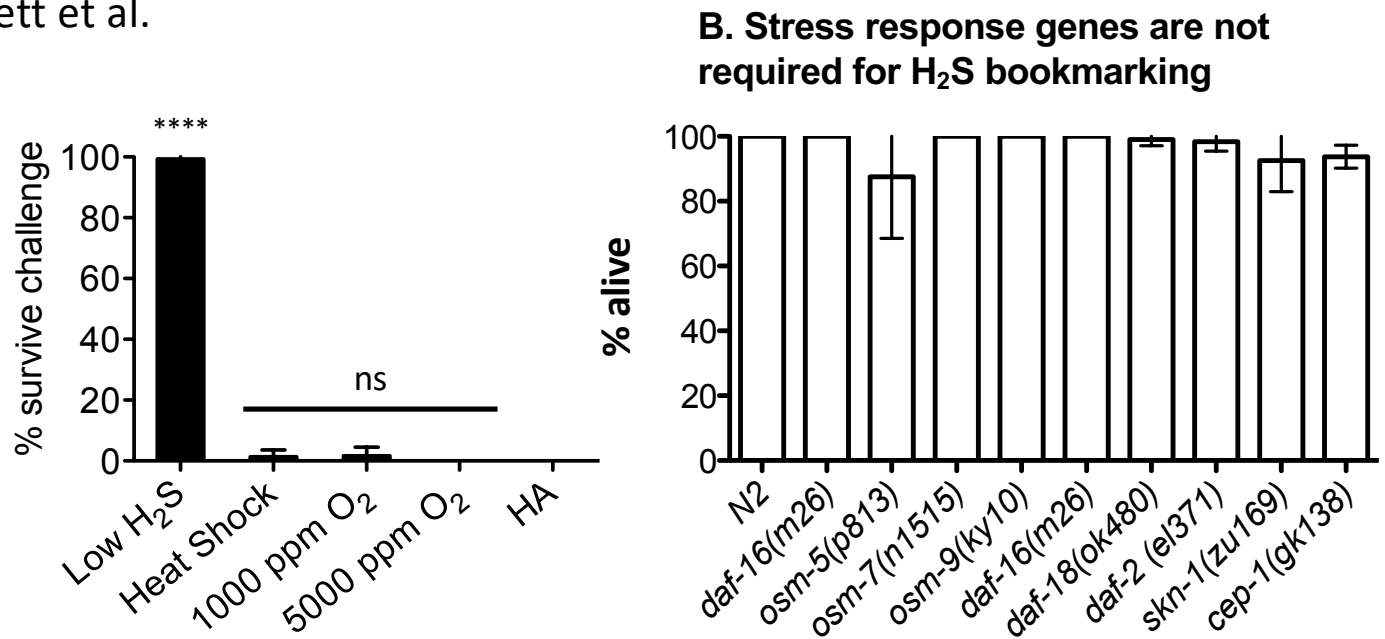

### Bookmarking is specific to H<sub>2</sub>S.

- A. Survival of animals exposed to high H<sub>2</sub>S. L4 animals were exposed to either low H<sub>2</sub>S for 4 h, 37°C for 1 h (heat shock), or hypoxia (1,000 ppm or 5,000 ppm O<sub>2</sub>) for 16 h. After treatment, animals were returned to room air. 48 hours later, animals were challenged with high H<sub>2</sub>S and scored for survival.
- B. General stress response pathways are not required for H<sub>2</sub>S bookmarking. Animals with mutations in genes involved in general stress responses were adapted to low H<sub>2</sub>S and challenged with high H<sub>2</sub>S 48 hours later. For both panels, each experiment was repeated at least five times, with 30-40 animals. Graphs shows mean +/- SD. Statistical comparisons were between controls (animals in house air (HA) or the N2 wild-type strain) and treatment groups: \*\*\*\*, p-value <0.0001; ns, not significant.
